# Supplementary material
Source: publisher site journal article supplement (https://www.dovepress.com/article/479214)
Supplement: Supplementary file 1 [file get_supplementary_file.php]

| Prognostic factor | Univariate Hazard Ratio(95%CI) | P value |
| --- | --- | --- |
| Log2(SII) quartiles |  |  |
| Q1 | Reference |  |
| Q2 | 1.246(0.745-2.084) | 0.401 |
| Q3 | 1.900(1.174-3.073) | 0.009 |
| Q4 | 3.381(2.154-5.308) | <0.001 |
| SII/100 | 1.009(1.006-1.013) | <0.001 |
| Age (Year) | 1.024(1.011~1.037) | <0.001 |
| Sex |  |  |
| Male | Reference |  |
| Female | 0.967(0.711~1.316) | 0.831 |
| BMI (kg/m2) | 0.963(0.926~1.001) | 0.058 |
| mMRC |  |  |
| <2 | Reference |  |
| ≥2 | 1.424(1.058~1.917) | 0.020 |
| COPD |  |  |
| No | Reference |  |
| Yes | 1.785(0.790~4.030) | 0.163 |
| Asthma |  |  |
| No | Reference |  |
| Yes | 0.696(0.378~1.282) | 0.245 |
| ALB, g/L | 0.937(0.903~0.973) | 0.001 |
| The number of acute exacerbations in the previous year | 1.239(1.082~1.420) | 0.002 |
| Infection with P. aeruginosa |  |  |
| No | Reference |  |
| Yes | 1.433(1.004~2.046) | 0.048 |
| Infection with other bacteria |  |  |
| No | Reference |  |
| Yes | 1.375(0.854~2.213) | 0.190 |
| The number of affected lobes | 1.115(1.028~1.208) | 0.009 |
| Modified Reiff score | 1.087(1.047~1.128) | <0.001 |

Supplementary Table 1: Univariate Cox proportional hazards regression analysis for readmission in bronchiectasis patients

Abbreviations: SII, Systemic Immune-Inflammation Index; BMI, body mass index; COPD, chronic obstructive pulmonary disease; mMRC, modified British medical research council; ALB, albumin.
